# Supplementary material for: The association between benzodiazepine use and greater risk of neurocognitive impairment is moderated by medical burden in people with HIV
Source: Springer Nature journal article supplement (doi:10.1007/s13365-022-01076-1), 2022-04-07
Supplement: MOESM1 [file 20293798]

Supplemental Table 1. Individual components of the medical burden index and each deficit criterion and mode of assessment.

| <b>Variable</b>                | <b>Deficit Criteria</b>                                     | <b>Mode of Assessment</b>                        |
|--------------------------------|-------------------------------------------------------------|--------------------------------------------------|
| <i>Clinical Measurements</i>   |                                                             |                                                  |
| 1. Abnormal BMI                | >25 or <18kg/m <sup>2</sup>                                 | In-clinic measure                                |
| 2. Low white blood cell count  | <4000 cells/μl                                              | Laboratory value                                 |
| 3. Abnormal BUN                | <8 mg/dl or >23 mg/dl                                       | Laboratory value                                 |
| 4. Low albumin (serum)         | <3.5 mg                                                     | Laboratory value                                 |
| 5. Elevated fibrinogen         | >3.25                                                       | Laboratory value                                 |
| 6. Low eGFR                    | <60                                                         | Laboratory value                                 |
| 7. Low hemoglobin              | Male: <12 μmol/l;<br>Female: <10 μmol/l                     | Laboratory value                                 |
| 8. Elevated AST                | >31 U/l                                                     | Laboratory value                                 |
| 9. Elevated ALT                | >31 U/l                                                     | Laboratory value                                 |
| 10. Elevated triglycerides     | ≥150 mg/dl                                                  | Laboratory value                                 |
| 11. Elevated total cholesterol | >200 mg/dl                                                  | Laboratory value                                 |
| 12. Low HDL cholesterol        | Male: <40 mg/dl; Female:<br><50 mg/dl                       | Laboratory value                                 |
| 13. Elevated glucose           | >200 mg/dl                                                  | Laboratory value                                 |
| 14. Low platelets              | <150 billion/l                                              | Laboratory value                                 |
| <i>Comorbidities</i>           |                                                             |                                                  |
| 15. Cerebrovascular accident   | Positive                                                    | Self-report/medical records                      |
| 16. COPD                       | Positive                                                    | Self-report/medical records                      |
| 17. Diabetes mellitus          | Positive                                                    | Self-report/medical records                      |
| 18. HCV                        | Positive                                                    | Self-report/medical records                      |
| 19. Hyperlipidemia             | Positive                                                    | Self-report/medical records                      |
| 20. Hypertension               | Positive or >130 mmHg<br>systolic or > 85 mmHg<br>diastolic | Self-report/medical<br>records/In-clinic measure |
| 21. Liver disease (mild)       | Positive                                                    | Self-report/medical records                      |
| 22. Malignancy                 | Positive                                                    | Self-report/medical records                      |
| 23. Myocardial infarction      | Positive                                                    | Self-report/medical records                      |
| 24. Renal disease              | Positive                                                    | Self-report/medical records                      |
| <i>HIV Specific</i>            |                                                             |                                                  |
| 25. Low current CD4            | <500 cells/μl                                               | Laboratory value                                 |
| 26. Nadir CD4                  | <200 cells/μl                                               | Laboratory value                                 |
| 27. CD4/8 ratio                | <1.0                                                        | Laboratory value                                 |
| 28. Duration of infection      | >10 years                                                   | Self-report                                      |

Notes. BMI = body mass index, BUN = blood urea nitrogen, eGFR = Estimated Glomerular Filtration Rate, AST = Aspartate transaminase, ALT = Alanine transaminase, HDL = high density lipoprotein, COPD = chronic obstructive pulmonary disease, HCV = hepatitis c virus
